# Supplementary material
Source: publisher site journal article supplement (https://www.spandidos-publications.com/8393/downloadSupplementary)

Figure S1. mRNA expression levels of (A) NOX2, (B) Nrf2 and (C) Cu/Zn-SOD in mouse colons. The 18S ribosome gene was used as an internal control. \*P<0.05 vs. chow-DSS. \*\*P<0.01 vs. chow-DSS. DSS, dextran sulfate sodium; ASH, *Acanthopanax senticosus* Harms; NOX2, NADPH oxidase 2; Nrf2, nuclear factor erythroid 2-related factor 2; Cu/Zn-SOD, Cu/Zn-superoxide dismutase.

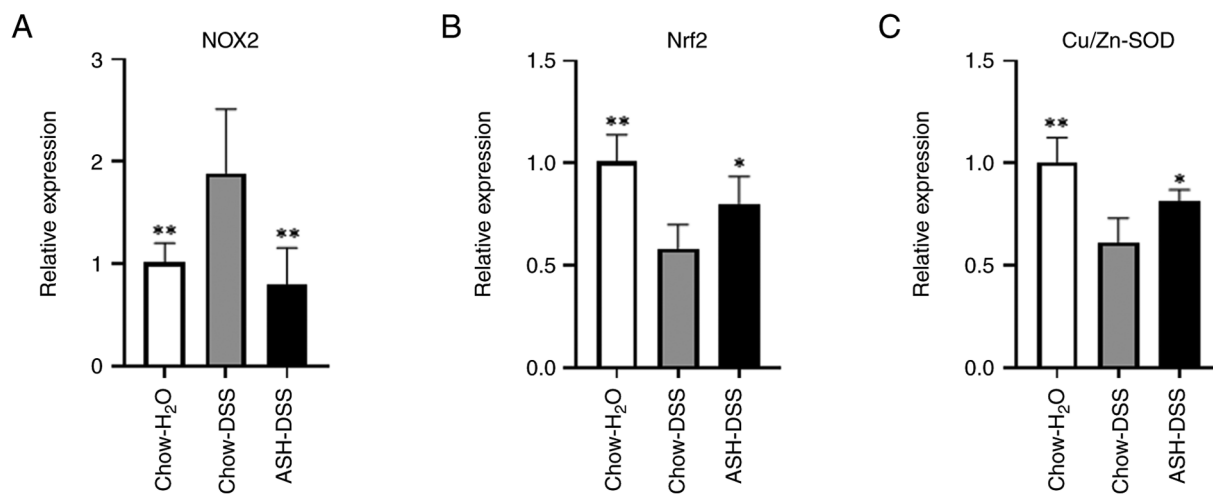

Supplement: Supplementary file 1 [file downloadSupplementary]
